# Supplementary material for: A Novel Mouse Model of Diffuse Intrinsic Pontine Glioma Initiated in Pax3-Expressing Cells
Source: PubMed Central journal article supplement — Neoplasia. 2016 Jan 21;18(1):60–70. doi: 10.1016/j.neo.2015.12.002 (PMC4735629; doi:10.1016/j.neo.2015.12.002), 2016-01-21
Supplement: mmc1.pdf [file mmc1.pdf]

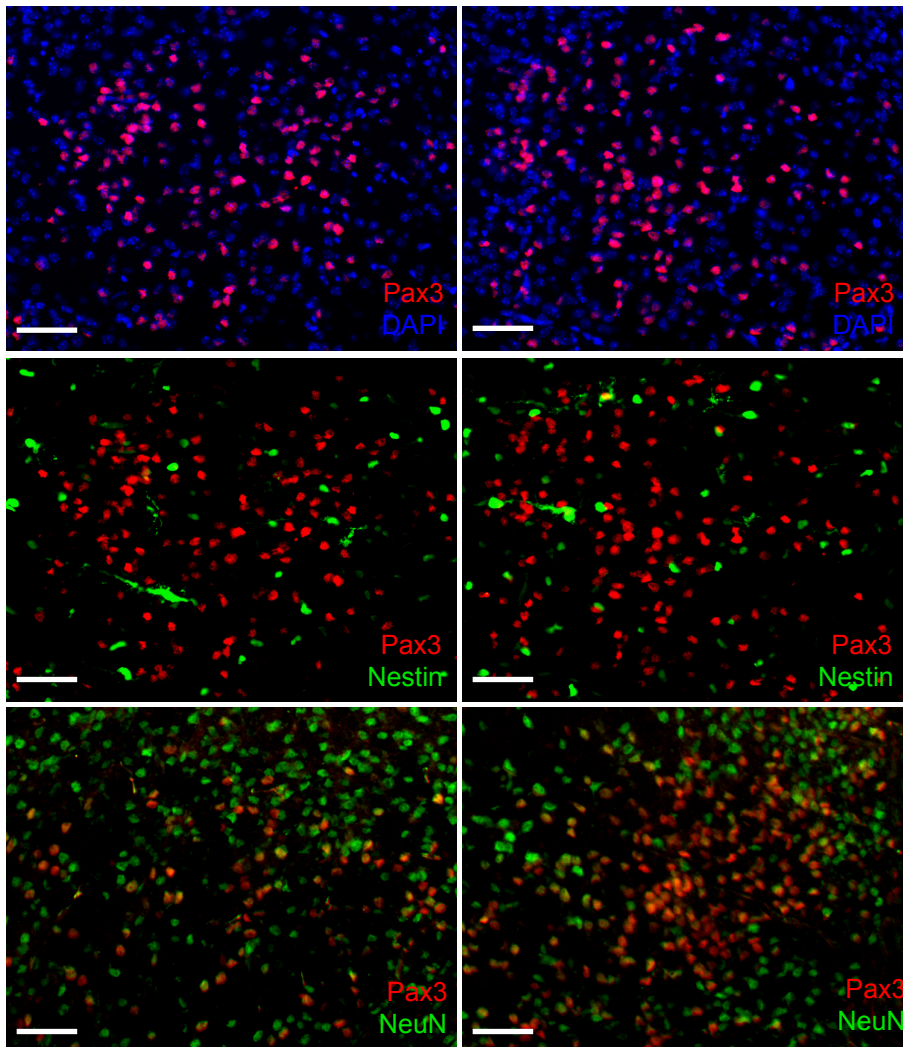

**Figure S1. Pax3-expressing cells in the dorsal thalamus.** Co-immunofluorescence of wildtype P3 mouse thalamus for Pax3 and DAPI (upper panels), Nestin-CFP (using a GFP antibody) (middle panels), and NeuN (lower panels). Magnification is 20x and the scale bars are 50  $\mu\text{m}$ .
