# Supplementary material for: A Novel Mouse Model of Diffuse Intrinsic Pontine Glioma Initiated in Pax3-Expressing Cells
Source: PubMed Central journal article supplement — Neoplasia. 2016 Jan 21;18(1):60–70. doi: 10.1016/j.neo.2015.12.002 (PMC4735629; doi:10.1016/j.neo.2015.12.002), 2016-01-21
Supplement: mmc2.pdf [file mmc2.pdf]

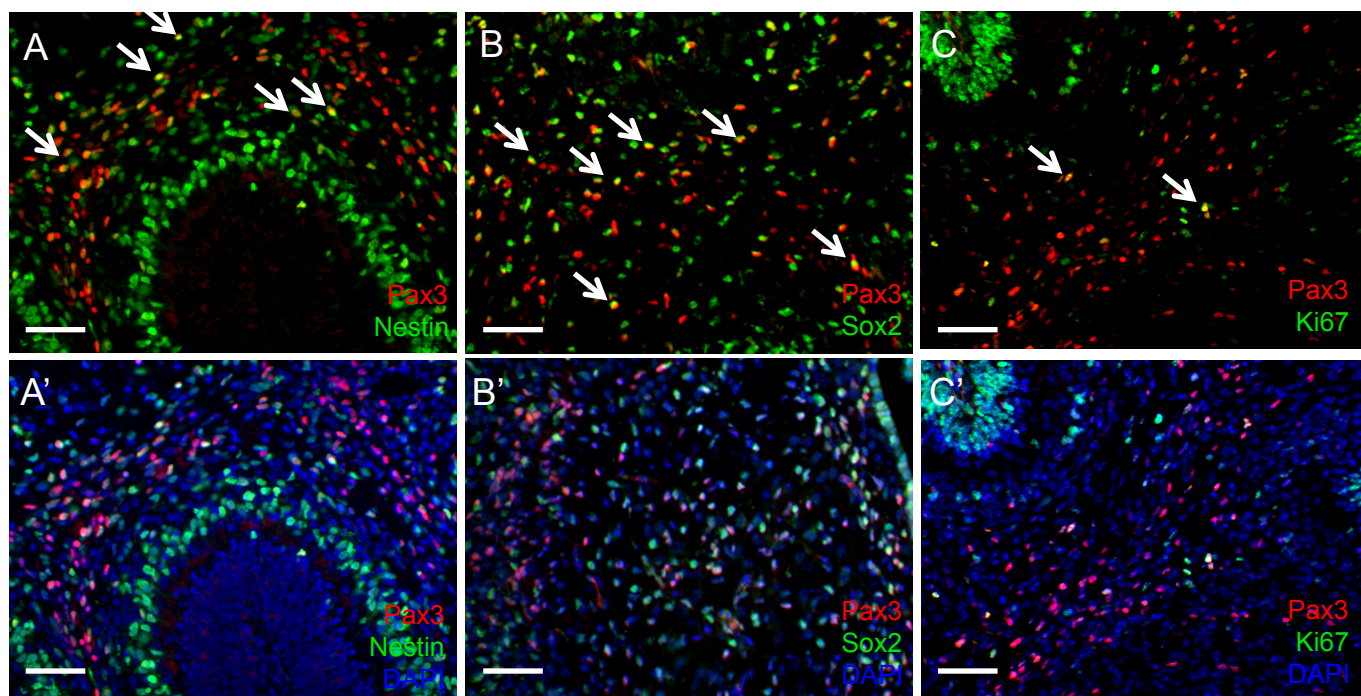

**Figure S2. Pax3-expressing cells in the internal granule layer of the cerebellum.** Co-immunofluorescence of wildtype P3 mouse cerebellum for Pax3 and Nestin-CFP (using a GFP antibody) (A), Sox2 (B), and Ki67 (C). DAPI counterstain is shown in (A'-C') to indicate total nuclei. 20x magnification, scale bar is 50  $\mu$ m. White arrows point to double positive cells.
