# Supplementary material for: A Novel Mouse Model of Diffuse Intrinsic Pontine Glioma Initiated in Pax3-Expressing Cells
Source: PubMed Central journal article supplement — Neoplasia. 2016 Jan 21;18(1):60–70. doi: 10.1016/j.neo.2015.12.002 (PMC4735629; doi:10.1016/j.neo.2015.12.002), 2016-01-21
Supplement: mmc3.pdf [file mmc3.pdf]

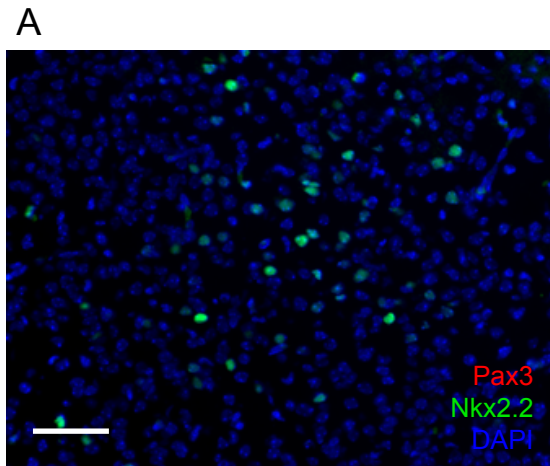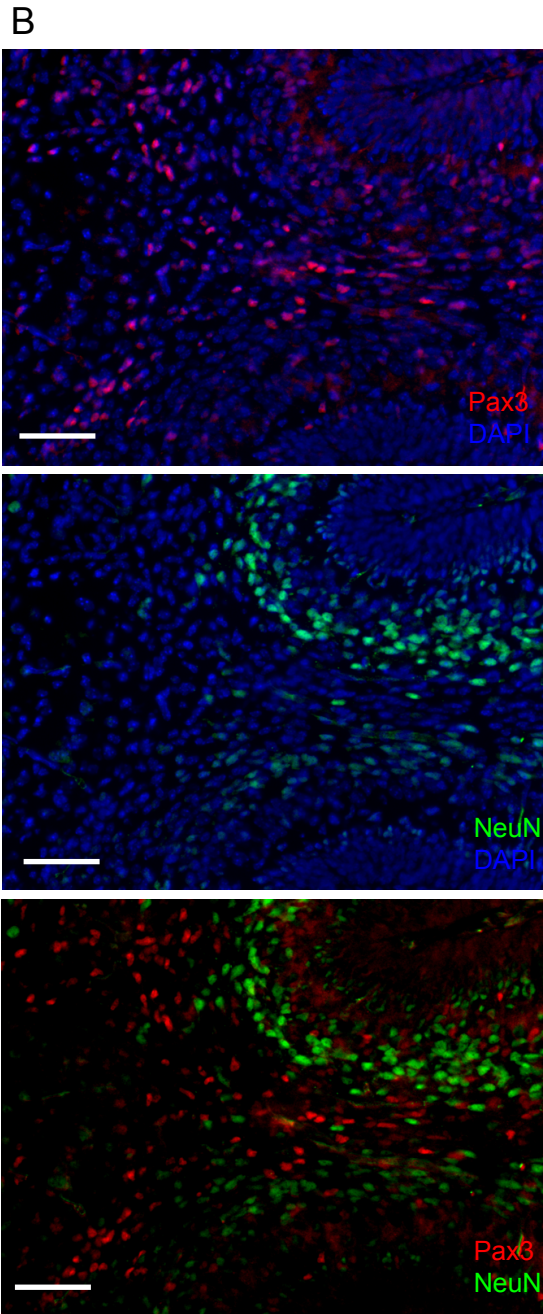

**Figure S3. Pax3-expressing progenitor cells in the neonatal mouse brain.** Co-immunofluorescence of wildtype P3 mouse brain for Pax3 and Nkx2.2 in the midbrain (A), and for Pax3 and NeuN in the cerebellum (B). DAPI counterstain is shown to indicate total nuclei. 20x magnification, scale bar is 50  $\mu$ m.
