# Supplementary material for: A Novel Mouse Model of Diffuse Intrinsic Pontine Glioma Initiated in Pax3-Expressing Cells
Source: PubMed Central journal article supplement — Neoplasia. 2016 Jan 21;18(1):60–70. doi: 10.1016/j.neo.2015.12.002 (PMC4735629; doi:10.1016/j.neo.2015.12.002), 2016-01-21
Supplement: mmc4.pdf [file mmc4.pdf]

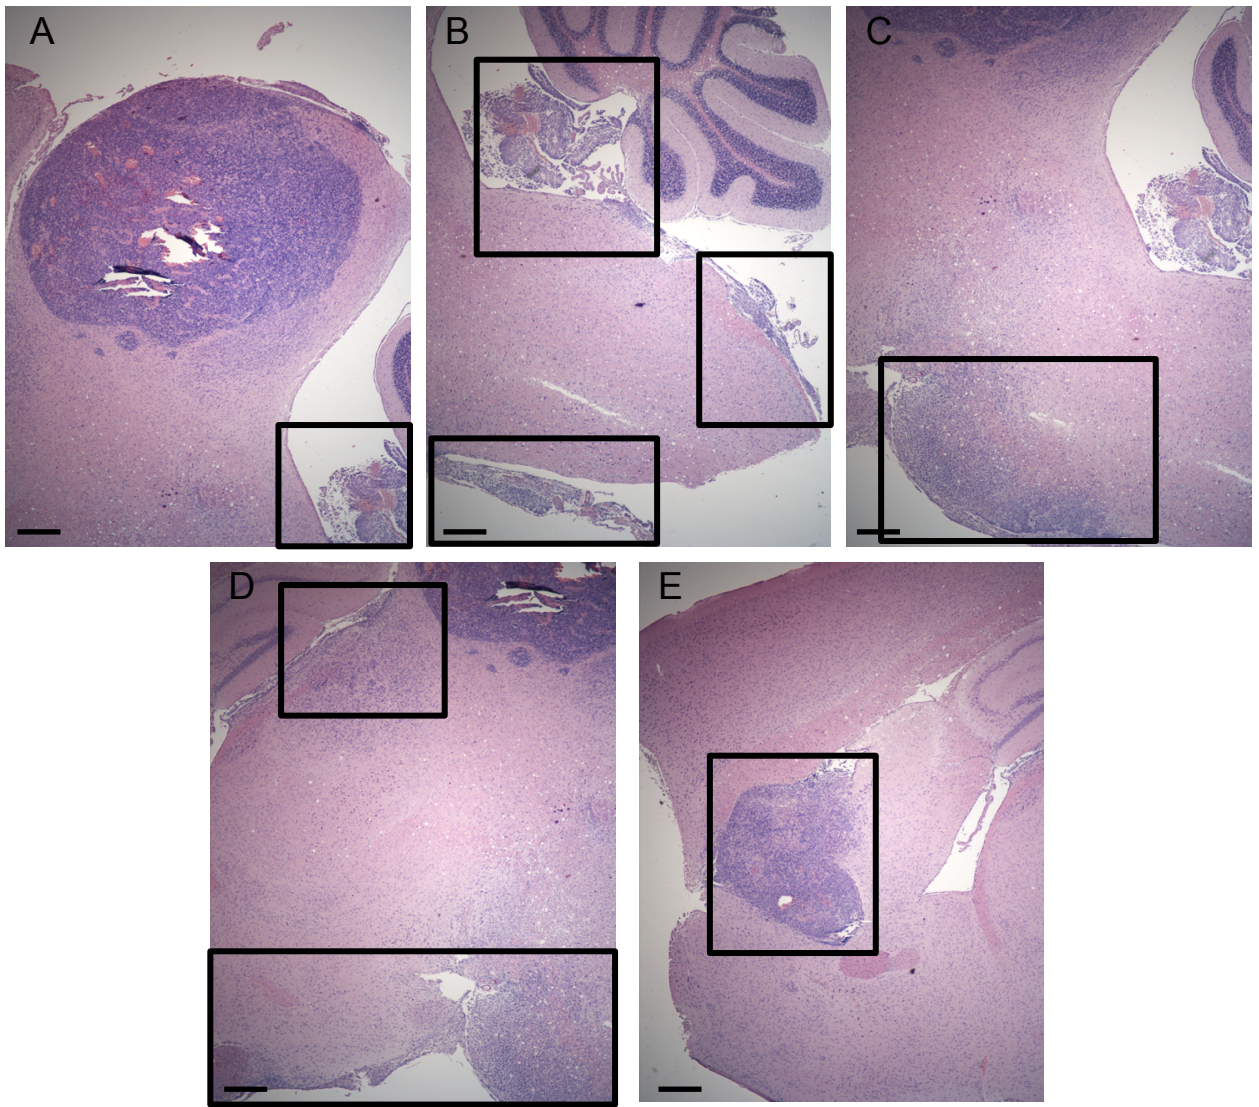

**Figure S4. Gliomas initiated in Pax3-Tv-a mice can spread throughout the brain.** Representative H&E staining of high grade BSG initiated in Pax3-Tv-a mice by PDGF-B, Cre, and H3.3K27M. Areas indicated with a black box show tumor cells in locations other than the primary tumor in the midbrain (shown in A). 2.5x magnification, scale bar is 400  $\mu\text{m}$ .
